# Supplementary material for: The FilZ Protein Contains a Single PilZ Domain and Facilitates the Swarming Motility of Pseudoalteromonas sp. SM9913
Source: MDPI journal article supplement (doi:10.3390/microorganisms11061566), 2023-06-13
Supplement: s1 [file s1]

## Supplemental Material

# The FilZ Protein Contains a Single PilZ Domain and Facilitates the Swarming Motility of *Pseudoalteromonas* sp. SM9913

Qi Sheng <sup>1</sup>, Ang Liu <sup>1</sup>, Peiling Yang <sup>1</sup>, Zhuowei Chen <sup>1</sup>, Peng Wang <sup>2,3</sup>, Haining Sun <sup>1</sup>, Chunyang Li <sup>2,3</sup>, Andrew McMinn <sup>2,4</sup>, Yin Chen <sup>2,5</sup>, Yuzhong Zhang <sup>1,2,3</sup>, Hainan Su <sup>1,\*</sup>, Xiulan Chen <sup>1,3</sup> and Yuqiang Zhang <sup>1,\*</sup>

<sup>1</sup> State Key Laboratory of Microbial Technology, Shandong University, Qingdao 266237, China

<sup>2</sup> Frontiers Science Center for Deep Ocean Multispheres and Earth System, College of Marine Life Sciences, Ocean University of China, Qingdao 266100, China

<sup>3</sup> Laboratory for Marine Biology and Biotechnology, Pilot National Laboratory for Marine Science and Technology, Qingdao 266237, China

<sup>4</sup> Institute for Marine and Antarctic Studies, University of Tasmania, Hobart, TAS 7005, Australia

<sup>5</sup> School of Life Sciences, University of Warwick, Coventry CV4 7AL, UK

\* Correspondence: suhn@sdu.edu.cn (H.S.); yqzh1989@sdu.edu.cn (Y.Z.);  
Tel.: +86-532-58632590 (H.S.); +86-532-58632576 (Y.Z.)

**Table S1 Bacterial strains and plasmids used in this study.**

| Strain or plasmid                                | Description <sup>a</sup>                                                                          | Source     |
|--------------------------------------------------|---------------------------------------------------------------------------------------------------|------------|
| <b>Strains</b>                                   |                                                                                                   |            |
| SM9913                                           | Wild type                                                                                         | [26]       |
| $\Delta filZ$                                    | <i>filZ</i> gene deletion mutant of SM9913                                                        | This study |
| $\Delta 2230$                                    | <i>PSM_A2230</i> gene deletion mutant of SM9913                                                   | This study |
| $\Delta filZ\Delta 2230$                         | Deletion mutant of the DNA region containing <i>filZ</i> and <i>PSM_A2230</i> genes               | This study |
| $\Delta 0915$                                    | <i>PSM_A0915</i> gene deletion mutant of SM9913                                                   | This study |
| 9913(pEV)                                        | Wild type strain harboring pEV plasmid                                                            | This study |
| $\Delta filZ$ (pEV)                              | $\Delta filZ$ mutant strain harboring pEV plasmid                                                 | This study |
| $\Delta filZ$ (pEV <sup><i>filZ</i></sup> )      | Complemented strain of the $\Delta filZ$ mutant                                                   | This study |
| $\Delta filZ$ (pEV <sup><i>filZ-R13A</i></sup> ) | $\Delta filZ$ mutant strain expressing the mutant protein FilZ-R13A                               | This study |
| $\Delta 0915$ (pEV <sup><i>0915</i></sup> )      | Complemented strain of the $\Delta 0915$ mutant                                                   | This study |
| $\Delta 0915$ (pEV <sup><i>filZ</i></sup> )      | $\Delta 0915$ mutant strain expressing protein FilZ                                               | This study |
| $\Delta 0915$ (pEV <sup><i>filZ-R13A</i></sup> ) | $\Delta 0915$ mutant strain expressing protein FilZ-R13A                                          | This study |
| $\Delta 0915$ (pEV)                              | $\Delta 0915$ mutant strain harboring pEV plasmid                                                 | This study |
| <i>E. coli</i> MW3064                            | Donor strain for conjugation                                                                      | [54]       |
| <i>E. coli</i> DH5 $\alpha$                      | Strain for cloning                                                                                | Vazyme     |
| <i>E. coli</i> BL21(DE3)                         | Strain for high level expression of heterologous proteins                                         | Vazyme     |
| <b>Plasmids</b>                                  |                                                                                                   |            |
| pK18- <i>mobsacB</i> -Ery                        | Suicide vector for gene knockout, Kan <sup>r</sup> , Ery <sup>r</sup>                             | [54]       |
| pK18- <i>filZ</i>                                | pK18 <i>mobsacB</i> -Ery containing the homologous arms of <i>filZ</i> gene                       | This study |
| pK18-2230                                        | pK18 <i>mobsacB</i> -Ery containing the homologous arms of <i>PSM_A2230</i> gene                  | This study |
| pEV                                              | Cloning vector for gene complementation, Amp <sup>r</sup> , Cm <sup>r</sup>                       | [38]       |
| pEV <sup><i>filZ</i></sup>                       | pEV plasmid expressing FilZ                                                                       | This study |
| pEV <sup><i>filZ-R13A</i></sup>                  | pEV plasmid expressing the mutant protein FilZ-R13A                                               | This study |
| pEV <sup><i>0915</i></sup>                       | pEV plasmid expressing protein A0915                                                              | This study |
| pKT25                                            | The constructed plasmid in two-hybrid system                                                      | [35]       |
| pUT18C                                           | The constructed plasmid in two-hybrid system                                                      | [35]       |
| pKT25-2230                                       | The constructed plasmid in two-hybrid system, expressing the fusion protein T25-A2230             | This study |
| pKT25- <i>cheA</i>                               | The constructed plasmid in two-hybrid system, expressing the fusion protein T25-CheA              | This study |
| pKT25- <i>fliM<sub>p</sub></i>                   | The constructed plasmid in two-hybrid system, expressing the fusion protein T25-FliM <sub>p</sub> | This study |
| pKT25- <i>fliM</i>                               | The constructed plasmid in two-hybrid system, expressing the fusion protein T25-FliM              | This study |
| pUT18C-2230                                      | The constructed plasmid in two-hybrid system, expressing the fusion protein T18-A2230             | This study |
| pUT18C- <i>cheY</i>                              | The constructed plasmid in two-hybrid system, expressing the fusion protein T18-CheY              | This study |
| pUT18C- <i>filZ</i>                              | The constructed plasmid in two-hybrid system, expressing the fusion protein T18-FilZ              | This study |
| pUT18C- <i>filZ-R13A</i>                         | The constructed plasmid in two-hybrid system, expressing the fusion protein T18-FilZ-R13A         | This study |
| pET22b- <i>filZ</i>                              | Expressing protein FilZ                                                                           | This study |
| pET22b-A2230                                     | Expressing protein A2230 with a C-terminal 6x His tag                                             | This study |
| pGEX4T-1- <i>filZ</i>                            | Expressing protein FilZ with an N-terminal GST tag                                                | This study |

pGEX4T-1-*filZ-R13A*

Expressing protein FilZ-R13A with an N-terminal GST tag

This study

---

<sup>a</sup>Amp<sup>r</sup>, ampicillin resistance; Ery<sup>r</sup>, erythromycin resistance; Kan<sup>r</sup>, kanamycin resistance; Cm<sup>r</sup>, chloramphenicol resistance.

**Table 2 Primers used in this study<sup>a</sup>.**

| Primer (s)                            | Sequence (s) (5'–3')                                                                                                         |
|---------------------------------------|------------------------------------------------------------------------------------------------------------------------------|
| For two-hybrid assay                  |                                                                                                                              |
| pKT25- <i>cheA</i> -F/R               | GACTCTAGAGGATCCCCGGATGAGCTTTGA<br>AGTCGATGA/CGAATTCTTAGTTACTTAGGT<br><u>ACTTATCCAGCGTAATGCTTTA</u>                           |
| pKT25- <i>fliM<sub>p</sub></i> -F/R   | GACTCTAGAGGATCCCCGGGTGAGCGATTT<br>ATTATCCCA/CGAATTCTTAGTTACTTAGGTA<br><u>CTTACCAGTCTAAGTCTACAC</u>                           |
| pKT25- <i>fliM</i> -F/R               | GACTCTAGAGGATCCCCGGATGAGTAAAAC<br>GTAAAGCGC/CGAATTCTTAGTTACTTAGGT<br><u>ACTTAATTACTCGTTGTATTGT</u>                           |
| pKT25-2230-F/R                        | GACTCTAGAGGATCCCCGGATGAGTGAAGA<br>TAAATTACT/CGAATTCTTAGTTACTTAGGTA<br><u>CTTATATATCGCTTAACTCAT</u>                           |
| pUT18C- <i>filZ</i> -F/R              | GACTCTAGAGGATCCCCGGATGAGTAACCA<br>ATCAGAAAC/ACTTAGTTATATCGATGAATT<br><u>CGACTATGCATTGGTTTTTTTTG</u>                          |
| pUT18C-2230-F/R                       | GACTCTAGAGGATCCCCGGATGAGTGAAGA<br>TAAATTACT/ACTTAGTTATATCGATGAATTC<br><u>GATTATATATCGCTTAACTCAT</u>                          |
| pUT18C- <i>cheY</i> -F/R              | GACTCTAGAGGATCCCCGGTTGGATAAAAA<br>CATTAAAAAT/ACTTAGTTATATCGATGAATT<br><u>CGATTAAACCTAAGCGTTCGAACA</u>                        |
| pUT18C- <i>filZ-R13A</i> -F/R         | ATCTTTGAGGTTTAAATTCCATGCTTTGTAA<br>CTTCGTTTAGTTTCTGATTGGTTAC/GTAACC<br>AATCAGAACTAAACGAAGTTACAAAGCAT<br>GGAATTTAAACCTCAAAGAT |
| For gene mutation and complementation |                                                                                                                              |
| pK18- <i>filZ</i> -up-F/R             | GTAAAACGACGGCCAGTGCC <u>AAGCTT</u> AATG<br>ATGGAAAACAAAAATC/AATAGCCTTTTCAG<br>CAGGCATTACTCATAATTCTCTTCAA                     |
| pK18- <i>filZ</i> -down-F/R           | TTGAAGAGAATTATGAGTAATGCCTGCTGA<br>AAAGGCTATT/GTCATAAGATTAGTCACTGG<br><u>GGATCCGCTTTTAGTTGTTTTAATGT</u>                       |
| pK18-2230-up-F/R                      | GTAAAACGACGGCCAGTGCC <u>AAGCTT</u> ACTT<br>TGATTATGCCGAGCTG/GACCATTACGAGGT<br>AAGAGCGCTTCTCTACATAAACTAT                      |
| pK18-2230-down-F/R                    | ATAGTTTTATGTAGAGAAGCGCTCTTACCTC<br>GTAATGGTC/GTCATAAGATTAGTCACTGGG<br><u>GATCCAACCTCTCAAGCGAAAAGCT</u>                       |
| pK18-0915-up-F/R                      | GTAAAACGACGGCCAGTGCC <u>AAGCTT</u> GTGC<br>ATTATTTTTGACGCAA/CATTTTATTTTTCCT<br>TCAAAGAGTTCCGGTTTACTAATAA                     |
| pK18-0915-down-F/R                    | TTATTAGTAAACCGGAACCTTTGAAGGAA<br>AAATAAAATG/GTCATAAGATTAGTCACTGG<br><u>GGATCCTCAAGCCCTGGCACACTGCC</u>                        |
| <i>filZ</i> -screen-F/R               | AAAAGTGATGACCATGGGCG/AATGCGAAC<br>AAGGCGAAATTC                                                                               |
| 2230-screen-F/R                       | ACCAGCTCTTGGTTTTGTTGTT/CATCTTTAA<br>ATTATCAATATCTCATCACTTTAGGT                                                               |
| 0915-screen-F/R                       | CGCTACCCCATTTATTAATAAATTCAAAG/ACT<br>GGCAATCATCGCCCC                                                                         |

|                                                                 |                                                                                                                               |
|-----------------------------------------------------------------|-------------------------------------------------------------------------------------------------------------------------------|
| pEV <sup>filZ</sup> -F/R                                        | TAAAAAACACACAACAGGAGATCTATGAGT<br>AACCAATCAGAAAC/GGTGGTGGTGGTGCTC<br><u>GAGCTATGCATTGGTTTTTTTTG</u>                           |
| pEV <sup>filZ-R13A</sup> -F/R                                   | ATCTTTGAGGTTTAAATTCCATGCTTTGTAA<br>CTTCGTTTAGTTTCTGATTGGTTAC/GTAACC<br>AATCAGAAACTAAACGAAGTTACAAAGCAT<br>GGAATTTAAACCTCAAAGAT |
| pEV <sup>0915</sup> -F/R                                        | TAAAAAACACACAACAGGAGATCTGTGTTT<br>GTTGATGCTGATAC/GGTGGTGGTGGTGCTC<br><u>GAGTTATGCAATTGCATCAATAT</u>                           |
| For heterologous protein expression<br>pET22b- <i>filZ</i> -F/R | TAAGAAGGAGATATACATATGATGAGTAAC<br>CAATCAGAAAC/GTGGTGGTGGTGGTGCTCG<br><u>AGCTATGCATTGGTTTTTTTTG</u>                            |
| pGEX4T-1- <i>filZ</i> -F/R                                      | GGATCTGGTTCGCGTGGATCCATGAGTAA<br>CCAATCAGAAAC/ACGATGCGGCCGCTCGA<br><u>GCTATGCATTGGTTTTTTTTG</u>                               |
| pGEX4T-1- <i>filZ-R13A</i> -F/R                                 | ATCTTTGAGGTTTAAATTCCATGCTTTGTAA<br>CTTCGTTTAGTTTCTGATTGGTTAC/GTAACC<br>AATCAGAAACTAAACGAAGTTACAAAGCAT<br>GGAATTTAAACCTCAAAGAT |
| pET22b- <i>A2230</i> -F/R                                       | TAAGAAGGAGATATACATATGATGAGTGAA<br>GATAAATTACT/GTGGTGGTGGTGGTGCTCG<br><u>AGTTATATATCGCTTAACTCAT</u>                            |
| For real-time qPCR<br><i>rpoD</i> -rt-F/R                       | CGCATATTATTGACTGGTTAGGTG/CAAGGG<br>TTGAGGGTTCATAGC                                                                            |
| <i>filZ</i> -rt-F/R                                             | ATTACGAGCCAGAGTCAGTTCAG/CCACACC<br>ACCCACGCTAATG                                                                              |
| <i>2230</i> -rt-F/R                                             | CCTTCGTATGTGATTGGTAT/CTTGCTCTTCT<br>GCTTCAA                                                                                   |

---

<sup>a</sup>The underlined nucleotides represent restriction sites.

**Table S3 (separate file).**

Table S3 is available as a separate Excel file. The legend is given below.

Table S3 Information of bacteria involved in the phylogenetic analysis of FilZ homologs and the alignment of the lateral flagellar cluster regions containing the *filZ* gene. NA, not available.

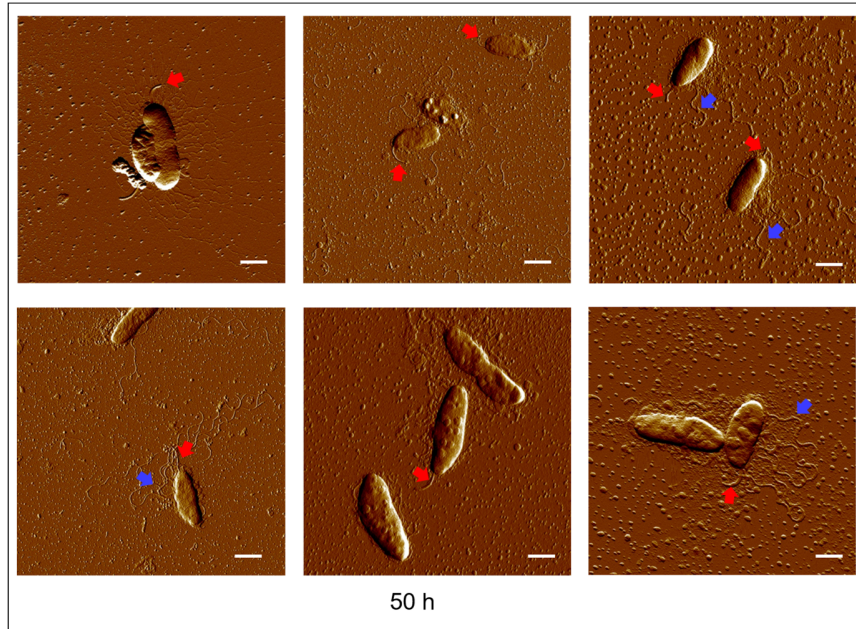

**Figure S1.** Observation of the production of flagella during strain SM9913 swarming at 50 h. Cells were extracted from the edge of the swarming colonies. The red arrow points to the polar flagellum, and the blue arrow points to the lateral flagella. Bar, 1  $\mu\text{m}$ .

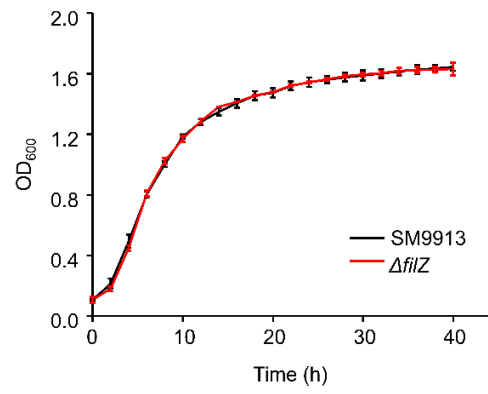

**Figure S2.** Growth curves of strain SM9913 and its mutant  $\Delta filZ$ . The strains were cultivated in marine LB broth at 15°C. The graph shows data from triplicate experiments (mean  $\pm$  SD).

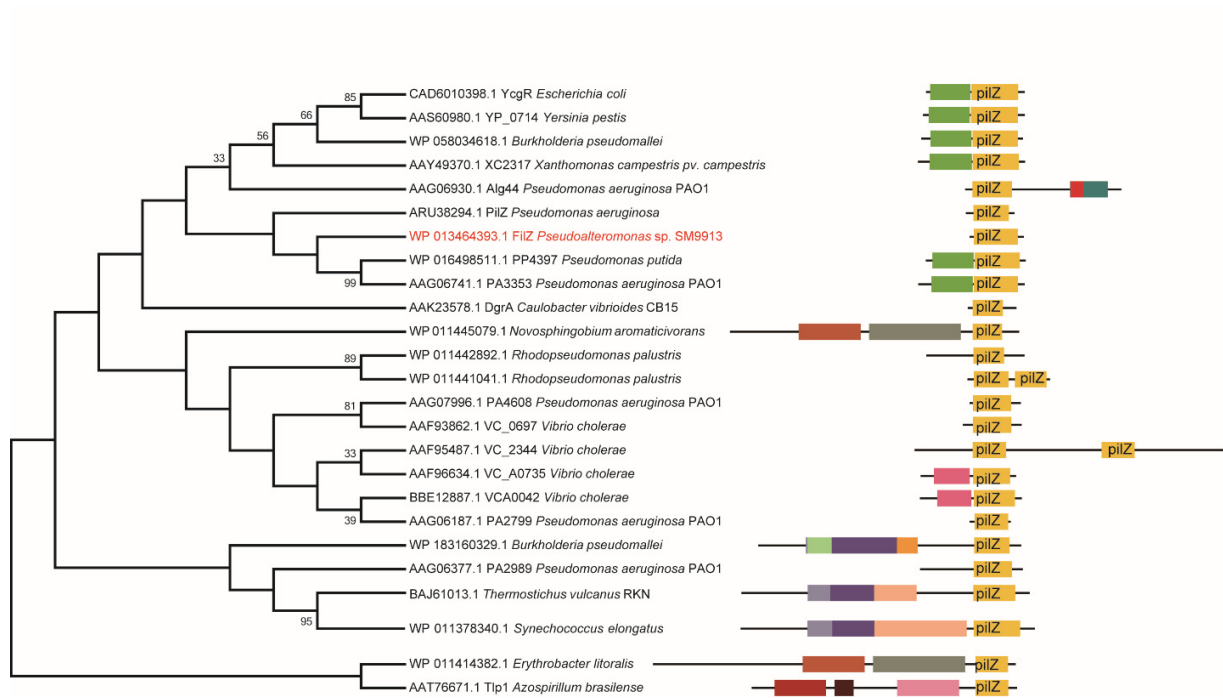

**Figure S3.** Phylogenetic analysis of bacterial PilZ domains. The left cladogram shows evolutionary relationships between PilZ domains inferred from maximum parsimony analysis of a multiple sequence alignment. The right diagrams schematize the domain organization of each PilZ protein inferred using RPS-BLAST analysis of the Conserved Domain Database (<https://www.ncbi.nlm.nih.gov/Structure/cdd>). FilZ of strain SM9913 was marked in red.

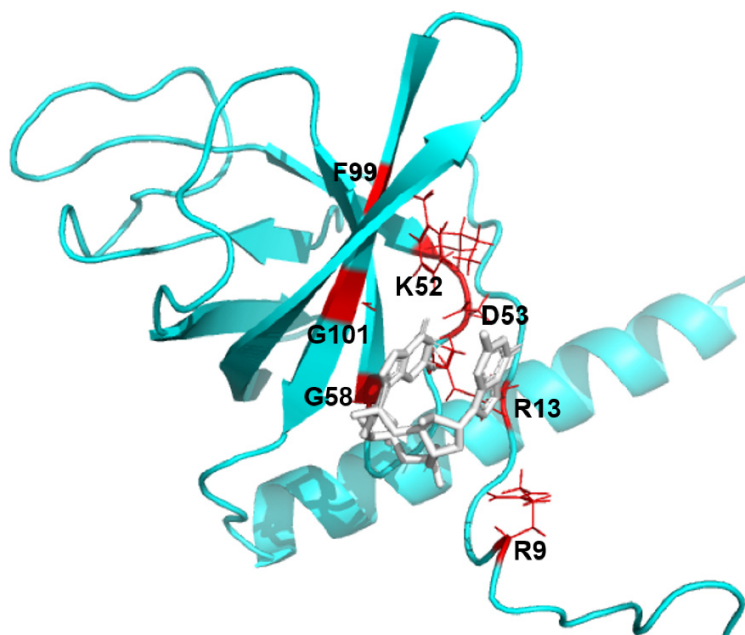

**Figure S4.** Predicted structure of protein FilZ (cyan) complexed with the c-di-GMP molecule (grey). The structure of FilZ was predicted by using I-Tasser (<https://seq2fun.dcm.b.med.umich.edu/I-TASSER-MR/>) based on the structure of the C-terminal PilZ domain of protein YcgR (YcgR-PilZ) from *E. coli* (PDB ID 5Y6F). The possible residues of FilZ involved in binding c-di-GMP, including R9, R13, K52, D53, G58, F99 and G101, are marked in red.

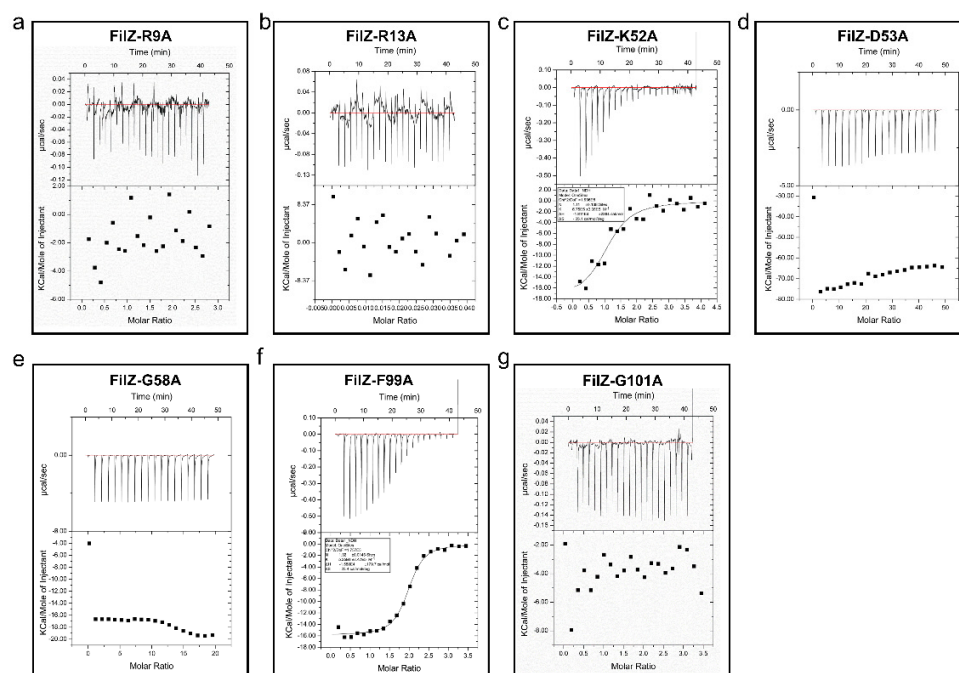

**Figure S5.** ITC detection of the c-di-GMP binding ability of recombinant FilZ mutants including FilZ-R9A (a), FilZ-R13A (b), FilZ-K52A (c), FilZ-D53A (d), FilZ-G58A (e), FilZ-F99A (f) and FilZ-G101A (g). The upper panels show the raw calorimetric data of the titration, and the lower panels show the corresponding integrated injection heats. The curves represent the best least-squares fits to the one binding site model. The graphs are representatives of at least three replicates.

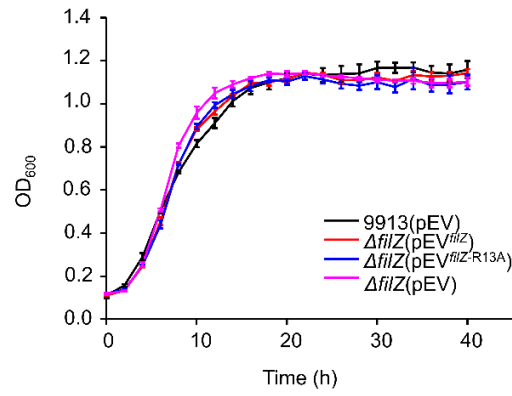

**Figure S6.** Growth curves of strains 9913(pEV),  $\Delta filZ$ (pEV<sup>filZ</sup>),  $\Delta filZ$ (pEV<sup>filZ-R13A</sup>) and  $\Delta filZ$ (pEV). All these strains were cultivated in marine LB broth at 15°C. The graph shows data from triplicate experiments (mean  $\pm$  SD).

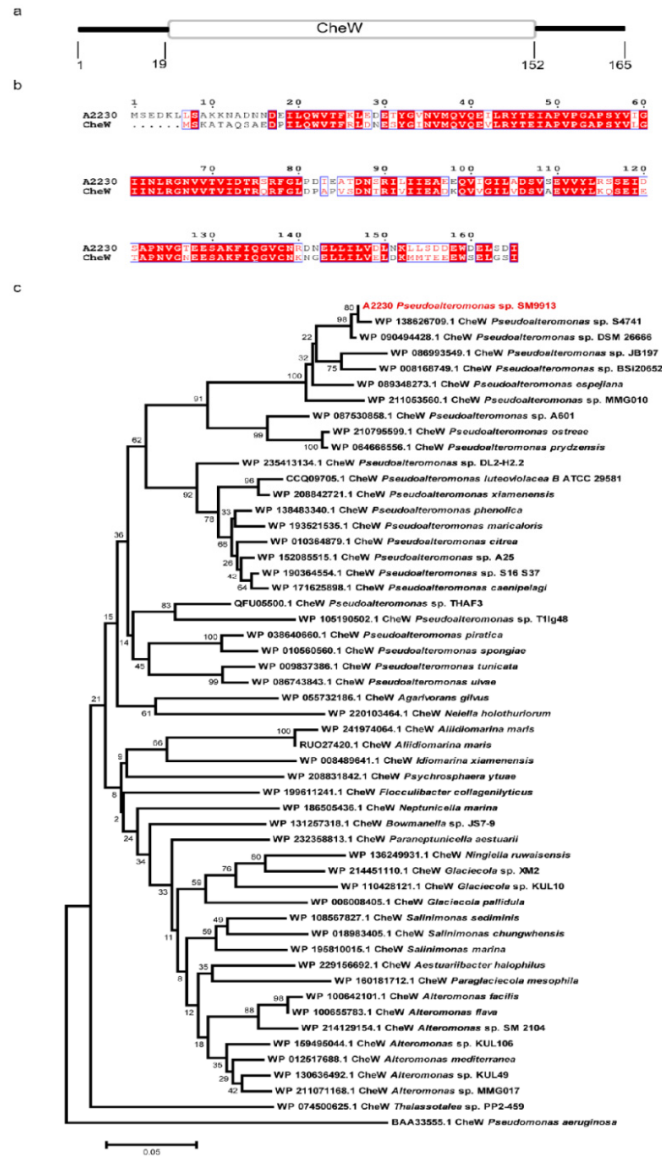

**Figure S7.** Sequence analysis of protein A2230. (a) Prediction of the protein domain in A2230 using the NCBI conserved domain database (<https://www.ncbi.nlm.nih.gov/Structure/cdd>). (b) Sequence alignment between protein A2230 and protein CheW (GenBank: BAA33555.1) of *Pseudomonas aeruginosa*. Sequence alignment shows a high identity (69%, 110/159 residues) between the two proteins. (c) Phylogenetic analysis of A2230 and its homologs obtained from the GenBank database by using MEGA 5. The phylogenetic tree was constructed using the neighbor-joining method with 1000 bootstrap replicates. The numbers at each tree node are the bootstrap values.

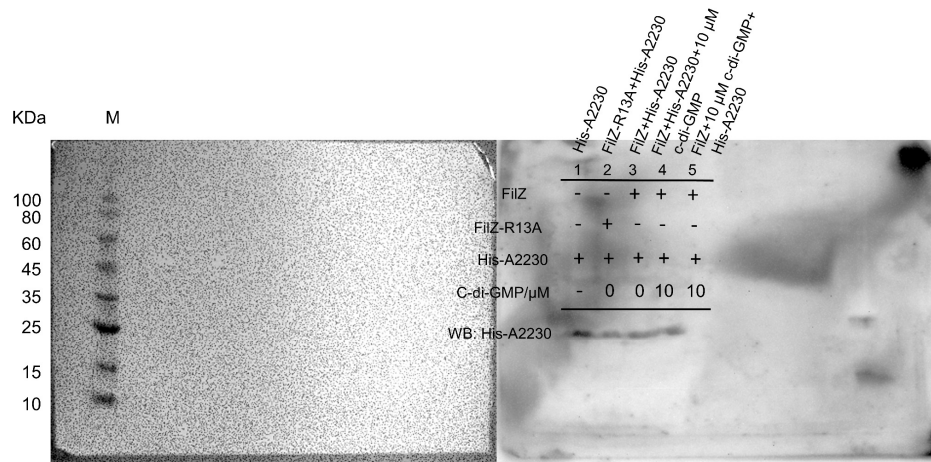

**Figure S8.** Pull down assay of the interaction between FilZ or FilZ-R13A and His-A2230 *in vitro* combined with Western Blot. The protein marker (the left) and the protein bands (the right) were from the same membrane of the Western Blot assay. Lanes 1 to 5, His-A2230 only, the mixture of FilZ-R13A and His-A2230, the mixture of FilZ and His-A2230, the addition of 10  $\mu$ M c-di-GMP in the FilZ-A2230 mixture, and addition of A2230 in the FilZ-c-di-GMP mixture, respectively.

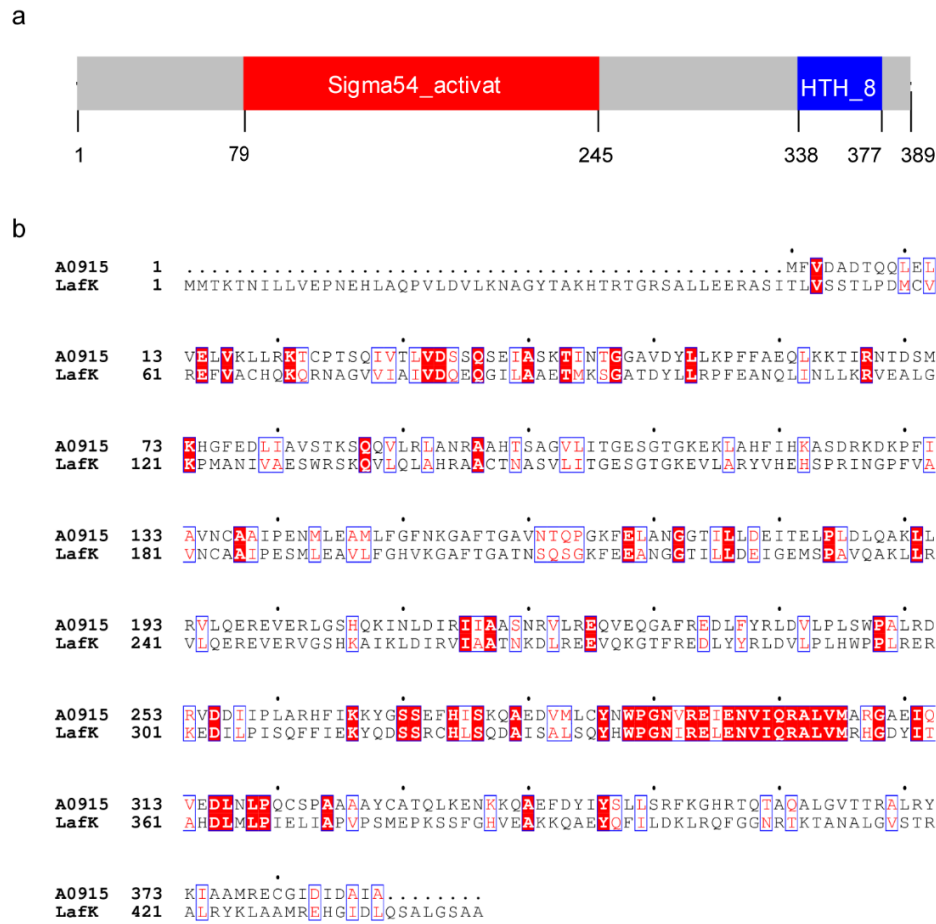

**Figure S9.** Sequence analysis of protein A0915. (a) Prediction of the protein domain in A0915 using the NCBI conserved domain database (<https://www.ncbi.nlm.nih.gov/Structure/cdd>). Protein A0915 contains an N-terminal Sigma54\_activat domain (pfam00158, E-value 5.72e-102) and a C-terminal HTH\_8 domain (pfam02954, 5.11e-04). (b) Sequence alignment between protein A0915 and protein LafK (GenBank: SUQ08311.1) of *Vibrio parahaemolyticus*. Sequence alignment shows a high identity (40.9%, 211/378 residues) between the two proteins.
